# Supplementary material for: After the first wave and beyond lockdown: long-lasting changes in emergency department visit number, characteristics, diagnoses, and hospital admissions
Source: Springer Nature journal article supplement (doi:10.1007/s11739-021-02667-2), 2021-03-08
Supplement: MOESM1 [file 18940722]

## **After the first wave and beyond lockdown: long-lasting changes in emergency department visit number, characteristics, diagnoses, and hospital admissions**

Fulvio Morello M.D. Ph.D., Paolo Bima M.D., Enrico Ferreri M.D., Michela Chiarlo M.D., Paolo Balzaretto M.D., Gloria Tirabassi M.D., Paolo Petitti M.D., Franco Aprà M.D., Domenico Vallino M.D., Giorgio Carbone M.D., Emanuele Emilio Pivetta M.D., Enrico Lupia M.D. Ph.D.

### **APPENDIX SUPPLEMENTARY DATA**

**Appendix Table 1.** Characteristics of participant hospitals.

| <b>Hospital name</b> | <b>2019 ED visits</b> | <b>2019 hospital admissions</b> | <b>2019 mean admission rate</b> | <b>Academic site</b> | <b>Hospital type</b>    |
|----------------------|-----------------------|---------------------------------|---------------------------------|----------------------|-------------------------|
| Maria Vittoria       | 84000                 | 8100                            | 9.6%                            | No                   | Secondary               |
| Molinette            | 70500                 | 14500                           | 20.6%                           | Yes                  | Large tertiary referral |
| San Giovanni Bosco   | 69000                 | 5550                            | 8.0%                            | No                   | Tertiary referral       |
| Ordine Mauriziano    | 57000                 | 6200                            | 10.9%                           | No                   | Secondary               |
| Humanitas Gradenigo  | 41000                 | 2200                            | 5.4%                            | No                   | Community               |

**Appendix Table 2.** ICD-9-CM grouping codes.

| <b>Pathological group</b>              | <b>ICD-9-CM codes</b>                              |
|----------------------------------------|----------------------------------------------------|
| Infectious diseases                    | 001-139; 785.52; 780.6; 995.90-995.99              |
| Oncological diseases                   | 140-239                                            |
| Metabolic and endocrine diseases       | 240-279                                            |
| Hematological diseases                 | 280-289                                            |
| Psychiatric diseases                   | 290-319                                            |
| Neurological diseases                  | 320-389; 780.3; 784.0-784.99                       |
| Cardiovascular diseases                | 390-459; 785.0-785.51; 441.0-441.99; 997.1; 997.91 |
| Respiratory diseases                   | 460-519; 786.0-786.49                              |
| Gastrointestinal diseases              | 520-579; 787.0-787.99; 789.0-789.99                |
| Urological diseases                    | 580-629; 788.0-788.99                              |
| Obstetrical and gynecological diseases | 610-611.9; 614-677                                 |
| Trauma and burns                       | 800-959.9                                          |
| Syncope                                | 780.2                                              |
| Unspecific chest pain                  | 786.50-786.59                                      |

**Appendix Table 3.** ED visit count classified by patient gender, age and time of arrival in the selected periods, with corresponding % change.

|                                | 31 <sup>st</sup> Mar-13 <sup>th</sup> Apr (peak period) |                 |                      |        | 16 <sup>th</sup> Jun-29 <sup>th</sup> Jun (early post-peak period) |                 |                      |        | 14 <sup>th</sup> Jul-27 <sup>th</sup> Jul (mid post-peak period) |                 |                      |        | 18 <sup>th</sup> Aug-31 <sup>st</sup> Aug (late post-peak period) |                 |                       |        |
|--------------------------------|---------------------------------------------------------|-----------------|----------------------|--------|--------------------------------------------------------------------|-----------------|----------------------|--------|------------------------------------------------------------------|-----------------|----------------------|--------|-------------------------------------------------------------------|-----------------|-----------------------|--------|
|                                | 2020                                                    | 2019            |                      |        | 2020                                                               | 2019            |                      |        | 2020                                                             | 2019            |                      |        | 2020                                                              | 2019            |                       |        |
|                                | cum. No.                                                | cum. No.        | %ch.                 | P      | cum. No.                                                           | cum. No.        | %ch.                 | P      | cum. No.                                                         | cum. No.        | %ch.                 | P      | cum. No.                                                          | cum. No.        | %ch.                  | P      |
| <b>General characteristics</b> |                                                         |                 |                      |        |                                                                    |                 |                      |        |                                                                  |                 |                      |        |                                                                   |                 |                       |        |
| Female sex                     | 1967<br>(47.2%)                                         | 6234<br>(50.2%) | 68.4%<br>(66.8-70.0) | <0.001 | 4128<br>(43.9%)                                                    | 6217<br>(49.3%) | 33.6%<br>(30.9-36.2) | <0.001 | 4140<br>(47.1%)                                                  | 5856<br>(49.8%) | 29.3%<br>(26.4-32.1) | <0.001 | 4111<br>(47.3%)                                                   | 5701<br>(50.2%) | 27.9%<br>(24.9-30.7)  | <0.001 |
| Male sex                       | 2201<br>(52.8%)                                         | 6186<br>(49.8%) | 64.4%<br>(62.6-66.1) | <0.001 | 5276<br>(56.1%)                                                    | 6392<br>(50.7%) | 17.5%<br>(14.4-20.4) | <0.001 | 4656<br>(52.9%)                                                  | 5912<br>(50.2%) | 22.2%<br>(18.2-24.2) | <0.001 | 4582<br>(52.7%)                                                   | 5664<br>(49.8%) | 19.1%<br>(15.9-22.2)  | <0.001 |
| Age >75y                       | 909<br>(21.8%)                                          | 2371<br>(19.1%) | 61.7%<br>(58.6-64.5) | <0.001 | 1729<br>(18.4%)                                                    | 2490<br>(19.7%) | 30.6%<br>(26.2-34.7) | <0.001 | 1650<br>(18.8%)                                                  | 2226<br>(18.9%) | 25.9%<br>(21.0-30.4) | <0.001 | 1747<br>(20.1%)                                                   | 2358<br>(20.7%) | 25.9%<br>(21.2-30.4)  | <0.001 |
| Age 65-75y                     | 594<br>(14.3%)                                          | 1611<br>(13.0%) | 63.1%<br>(66.4-59.5) | <0.001 | 1228<br>(13.1%)                                                    | 1604<br>(12.7%) | 23.4%<br>(17.5-28.9) | <0.001 | 1196<br>(13.6%)                                                  | 1463<br>(12.4%) | 18.3%<br>(11.8-24.3) | <0.001 | 1211<br>(13.9%)                                                   | 1592<br>(14.0%) | 23.9%<br>(18.0-29.4)  | <0.001 |
| Age 50-64y                     | 894<br>(21.4%)                                          | 2359<br>(18.9%) | 62.0%<br>(58.9-64.8) | <0.001 | 1846<br>(19.6%)                                                    | 2473<br>(19.6%) | 25.4%<br>(20.7-29.7) | <0.001 | 1943<br>(22.1%)                                                  | 2427<br>(20.6%) | 19.9%<br>(15.0-24.6) | <0.001 | 1840<br>(21.2%)                                                   | 2309<br>(20.3%) | 20.3%<br>(15.3-25.0)  | <0.001 |
| Age <50y                       | 1704<br>(40.9%)                                         | 6017<br>(48.4%) | 71.7%<br>(73.2-70.1) | <0.001 | 3748<br>(39.9%)                                                    | 6046<br>(47.9%) | 38.0%<br>(35.4-40.5) | <0.001 | 4018<br>(45.7%)                                                  | 5664<br>(48.1%) | 29.3%<br>(26.4-32.1) | <0.001 | 3900<br>(44.9%)                                                   | 5101<br>(44.9%) | 23.5%<br>(20.3-26.7%) | <0.001 |
| Pediatric (<14y)               | 73 (1.8%)                                               | 691 (5.6%)      | 89.4%<br>(86.6-91.7) | <0.001 | 253 (2.7%)                                                         | 596 (4.7%)      | 57.6%<br>(50.8-63.4) | <0.001 | 238 (2.7%)                                                       | 396 (3.4%)      | 39.9%<br>(29.4-48.8) | <0.001 | 195 (2.2%)                                                        | 352 (3.1%)      | 44.6%<br>(24.0-53.5)  | <0.001 |
| <b>Time of ED arrival</b>      |                                                         |                 |                      |        |                                                                    |                 |                      |        |                                                                  |                 |                      |        |                                                                   |                 |                       |        |
| 00-08                          | 650<br>(15.6%)                                          | 1571<br>(12.6%) | 58.6%<br>(55.5-63.0) | <0.001 | 1361<br>(14.5%)                                                    | 1746<br>(13.8%) | 22.1%<br>(16.3-27.4) | <0.001 | 1183<br>(13.4%)                                                  | 1694<br>(14.4%) | 33.1%<br>(24.7-35.1) | <0.001 | 1325<br>(15.2%)                                                   | 1689<br>(14.9%) | 21.6%<br>(15.7-27.0)  | <0.001 |
| 08-16                          | 2010<br>(48.2%)                                         | 6647<br>(53.5%) | 69.8%<br>(68.4-71.4) | <0.001 | 4719<br>(50.2%)                                                    | 6380<br>(50.6%) | 26.0%<br>(23.2-28.8) | <0.001 | 4503<br>(51.2%)                                                  | 5908<br>(50.2%) | 23.8%<br>(20.8-26.7) | <0.001 | 4429<br>(50.9%)                                                   | 5663<br>(49.8%) | 21.8%<br>(18.5-25.0)  | <0.001 |
| 16-24                          | 1508<br>(36.2%)                                         | 4202<br>(33.8%) | 64.1%<br>(62.3-66.5) | <0.001 | 3324<br>(35.3%)                                                    | 4483<br>(35.6%) | 25.9%<br>(22.5-29.1) | <0.001 | 3110<br>(35.4%)                                                  | 4166<br>(35.4%) | 25.3%<br>(21.8-28.7) | <0.001 | 2939<br>(33.8%)                                                   | 4013<br>(35.3%) | 26.8%<br>(23.2-30.2)  | <0.001 |

cum. No. = cumulative number; %ch. = percent change. Percent values in parentheses are relative to total ED visits in each period.

**Appendix Table 4.** ED visit count classified by triage code and main symptom in the selected periods, with corresponding % change.

|                                          | 31 <sup>st</sup> Mar-13 <sup>th</sup> Apr (peak period) |                  |                           |          | 16 <sup>th</sup> Jun-29 <sup>th</sup> Jun (early post-peak period) |                  |                            |          | 14 <sup>th</sup> Jul-27 <sup>th</sup> Jul (mid post-peak period) |                  |                           |          | 18 <sup>th</sup> Aug-31 <sup>st</sup> Aug (late post-peak period) |                 |                            |          |
|------------------------------------------|---------------------------------------------------------|------------------|---------------------------|----------|--------------------------------------------------------------------|------------------|----------------------------|----------|------------------------------------------------------------------|------------------|---------------------------|----------|-------------------------------------------------------------------|-----------------|----------------------------|----------|
|                                          | 2020                                                    | 2019             |                           |          | 2020                                                               | 2019             |                            |          | 2020                                                             | 2019             |                           |          | 2020                                                              | 2019            |                            |          |
|                                          | cum. No.                                                | cum. No.         | %ch.                      | <i>P</i> | cum. No.                                                           | cum. No.         | %ch.                       | <i>P</i> | cum. No.                                                         | cum. No.         | %ch.                      | <i>P</i> | cum. No.                                                          | cum. No.        | %ch.                       | <i>P</i> |
| <b>Triage codes</b>                      |                                                         |                  |                           |          |                                                                    |                  |                            |          |                                                                  |                  |                           |          |                                                                   |                 |                            |          |
| Red                                      | 165<br>(4.0%)                                           | 145<br>(1.2%)    | -13.8%<br>(-42.2-<br>9.0) | 0.256    | 150<br>(1.6%)                                                      | 149<br>(1.2%)    | -0.7% (-<br>24.7-<br>20.0) | 0.954    | 147<br>(1.7%)                                                    | 127<br>(1.1%)    | -15.7%<br>(-46.8-<br>8.7) | 0.227    | 114<br>(1.3%)                                                     | 129<br>(1.1%)   | 11.6% (-<br>13.7-<br>31.3) | 0.336    |
| Yellow                                   | 657<br>(15.8%)                                          | 1466<br>(11.8%)  | 55.2%<br>(50.9-<br>59.1)  | <0.001   | 1226<br>(13.0%)                                                    | 1419<br>(11.3%)  | 13.6%<br>(6.7-<br>20.0)    | <0.001   | 1050<br>(11.9%)                                                  | 1302<br>(11.1%)  | 19.4%<br>(12.5-<br>25.7)  | <0.001   | 1067<br>(12.3%)                                                   | 1324<br>(11.6%) | 19.4%<br>(12.6-<br>25.7)   | <0.001   |
| Green                                    | 2937<br>(70.5)                                          | 8200<br>(66.0%)  | 64.2%<br>(62.6-<br>65.7%) | <0.001   | 6569<br>(69.9%)                                                    | 8279<br>(65.7%)  | 20.7%<br>(18.0-<br>23.2)   | <0.001   | 5941<br>(67.5%)                                                  | 7844<br>(66.7%)  | 24.3%<br>(21.7-<br>26.8)  | <0.001   | 5728<br>(65.9%)                                                   | 7180<br>(63.2%) | 20.2%<br>(17.4-<br>23.0)   | <0.001   |
| White                                    | 409<br>(9.8%)                                           | 2609<br>(21.0%)  | 84.3%<br>(82.6-<br>85.9)  | <0.001   | 1459<br>(15.5%)                                                    | 2762<br>(21.9%)  | 47.2%<br>(43.7-<br>50.4)   | <0.001   | 1658<br>(18.8%)                                                  | 2495<br>(21.2%)  | 33.5%<br>(29.3-<br>37.5)  | <0.001   | 1784<br>(20.5%)                                                   | 2732<br>(24.0%) | 34.7%<br>(30.7-<br>38.5)   | <0.001   |
| Urgent<br>(red +<br>yellow)              | 822<br>(19.7%)                                          | 1611<br>(13.0%)  | 49.0%<br>(44.5-<br>53.1)  | <0.001   | 1376<br>(14.6%)                                                    | 1568<br>(12.4%)  | 12.2%<br>(5.7-<br>18.4)    | <0.001   | 1197<br>(13.6%)                                                  | 1429<br>(12.1%)  | 16.2%<br>(9.5-<br>22.4)   | <0.001   | 1181<br>(13.6%)                                                   | 1453<br>(12.8%) | 18.7%<br>(12.2-<br>24.7)   | <0.001   |
| Deferrabl<br>e (white +<br>green)        | 3346<br>(80.3%)                                         | 10809<br>(87.0%) | 69.0%<br>(67.8-<br>70.2)  | <0.001   | 8028<br>(85.4%)                                                    | 11041<br>(87.6%) | 27.3%<br>(25.2-<br>29.3)   | <0.001   | 7599<br>(86.4%)                                                  | 10339<br>(87.9%) | 26.5%<br>(24.3-<br>28.6)  | <0.001   | 7512<br>(86.4%)                                                   | 9912<br>(87.2%) | 24.2%<br>(21.9-<br>26.5)   | <0.001   |
| <b>Main symptom identified at triage</b> |                                                         |                  |                           |          |                                                                    |                  |                            |          |                                                                  |                  |                           |          |                                                                   |                 |                            |          |
| Dyspnea                                  | 550<br>(13.2%)                                          | 638<br>(5.1%)    | 13.8%<br>(3.4-<br>23.1)   | 0.011    | 422<br>(4.5%)                                                      | 526<br>(4.2%)    | 19.8%<br>(8.8-<br>29.4)    | 0.001    | 355<br>(4.0%)                                                    | 422<br>(3.6%)    | 15.9%<br>(3.1-<br>27.0)   | 0.016    | 414<br>(4.8%)                                                     | 486<br>(4.3%)   | 14.8%<br>(2.9-<br>25.3)    | 0.017    |
| Chest pain                               | 195<br>(4.7%)                                           | 541<br>(4.4%)    | 64.0%<br>(57.5-<br>69.4%) | <0.001   | 360<br>(3.8%)                                                      | 476<br>(3.8%)    | 24.4%<br>(13.3-<br>34.0)   | <0.001   | 304<br>(3.5%)                                                    | 452<br>(3.8%)    | 32.7%<br>(22.2-<br>41.8)  | <0.001   | 278<br>(3.2%)                                                     | 469<br>(4.1%)   | 40.7%<br>(31.2-<br>48.9)   | <0.001   |
| Abdomina<br>l pain                       | 243<br>(5.8%)                                           | 1152<br>(9.3%)   | 78.9%<br>(75.8-<br>81.6)  | <0.001   | 692<br>(7.4%)                                                      | 1068<br>(8.5%)   | 35.2%<br>(28.7-<br>41.1)   | <0.001   | 789<br>(9.0%)                                                    | 1115<br>(9.5%)   | 29.2%<br>(22.5-<br>35.4)  | <0.001   | 763<br>(8.8%)                                                     | 1082<br>(9.5%)  | 29.5%<br>(22.6-<br>35.7)   | <0.001   |
| Psychiatri<br>c symptom                  | 77 (1.8%)                                               | 180<br>(1.4%)    | 57.2%<br>(44.1-<br>67.2)  | <0.001   | 152<br>(1.6%)                                                      | 204<br>(1.6%)    | 26.0%<br>(8.1-<br>39.6)    | 0.006    | 167<br>(1.9%)                                                    | 291<br>(2.5%)    | 42.6%<br>(30.6-<br>52.6)  | <0.001   | 126<br>(1.4%)                                                     | 176<br>(1.5%)   | 28.4%<br>(10.0-<br>43.0)   | 0.004    |

cum. No. = cumulative number; %ch. = percent change. Percent values in parentheses are relative to total ED visits in each period.

**Appendix Table 5.** ED visit count classified by final diagnosis in the selected periods, with corresponding % change compared to 2019.

|                                  | 31 <sup>st</sup> Mar-13 <sup>th</sup> Apr (peak period) |              |                   |        | 16 <sup>th</sup> Jun-29 <sup>th</sup> Jun (early post-peak period) |              |                    |        | 14 <sup>th</sup> Jul-27 <sup>th</sup> Jul (mid post-peak period) |              |                    |        | 18 <sup>th</sup> Aug-31 <sup>st</sup> Aug (late post-peak period) |              |                    |        |
|----------------------------------|---------------------------------------------------------|--------------|-------------------|--------|--------------------------------------------------------------------|--------------|--------------------|--------|------------------------------------------------------------------|--------------|--------------------|--------|-------------------------------------------------------------------|--------------|--------------------|--------|
|                                  | 2020                                                    | 2019         |                   |        | 2020                                                               | 2019         |                    |        | 2020                                                             | 2019         |                    |        | 2020                                                              | 2019         |                    |        |
|                                  | cum. No.                                                | cum. No.     | %ch.              | P      | cum. No.                                                           | cum. No.     | %ch.               | P      | cum. No.                                                         | cum. No.     | %ch.               | P      | cum. No.                                                          | cum. No.     | %ch.               | P      |
| <b>ED final diagnosis</b>        |                                                         |              |                   |        |                                                                    |              |                    |        |                                                                  |              |                    |        |                                                                   |              |                    |        |
| Infectious diseases              | 209 (5.0%)                                              | 287 (2.3%)   | 27.2% (13.0-39.1) | <0.001 | 232 (2.5%)                                                         | 385 (3.1%)   | 39.7% (29.1-48.8)  | <0.001 | 249 (2.8%)                                                       | 362 (3.1%)   | 31.2% (19.2-41.5)  | <0.001 | 276 (3.2%)                                                        | 399 (3.5%)   | 30.8% (19.4-40.7)  | <0.001 |
| Oncological diseases             | 24 (0.6%)                                               | 59 (0.5%)    | 59.3% (34.6-74.7) | <0.001 | 64 (0.7%)                                                          | 73 (0.6%)    | 12.3% (-22.6-37.3) | 0.442  | 70 (0.8%)                                                        | 78 (0.7%)    | 10.3% (-23.9-35.0) | 0.511  | 67 (0.8%)                                                         | 76 (0.7%)    | 11.8% (-22.4-36.5) | 0.452  |
| Metabolic and Endocrine diseases | 39 (0.9%)                                               | 90 (0.7%)    | 62.7% (43.6-75.3) | <0.001 | 89 (0.9%)                                                          | 115 (0.9%)   | 22.6% (-2.1-41.3)  | 0.069  | 102 (1.2%)                                                       | 107 (0.9%)   | 4.7% (-25.0-27.3)  | 0.729  | 80 (0.9%)                                                         | 96 (0.8%)    | 16.7% (-12.1-38.1) | 0.228  |
| Hematologic diseases             | 31 (0.7%)                                               | 83 (0.7%)    | 62.7 (56.9-67.7)  | <0.001 | 78 (0.8%)                                                          | 78 (0.6%)    | 0.0% (-36.9-26.9)  | 1.0    | 69 (0.8%)                                                        | 84 (0.7%)    | 17.9% (-12.9-40.3) | 0.226  | 48 (0.6%)                                                         | 67 (0.6%)    | 28.4% (-3.8-50.5)  | 0.078  |
| Psychiatric diseases             | 256 (6.1%)                                              | 686 (5.5%)   | 62.7% (56.9-66.2) | <0.001 | 633 (6.7%)                                                         | 830 (6.6%)   | 23.7% (15.4-31.2)  | <0.001 | 625 (7.1%)                                                       | 793 (6.7%)   | 21.2% (12.5-29.0)  | <0.001 | 669 (7.7%)                                                        | 749 (6.6%)   | 10.7% (0.9-19.5)   | 0.034  |
| Neurological diseases            | 205 (4.9%)                                              | 1065 (8.6%)  | 80.8% (77.6-83.4) | <0.001 | 684 (7.3%)                                                         | 976 (7.7%)   | 29.9% (22.7-36.4)  | <0.001 | 685 (7.8%)                                                       | 929 (7.9%)   | 26.3% (18.6-31.2)  | <0.001 | 729 (8.4%)                                                        | 979 (8.6%)   | 25.5% (18.0-32.3)  | <0.001 |
| Cardiovascular diseases          | 407 (9.8%)                                              | 1075 (8.7%)  | 62.1% (57.6-66.2) | <0.001 | 844 (9.0%)                                                         | 915 (7.3%)   | 7.8% (-1.3-16.0)   | 0.091  | 785 (8.9%)                                                       | 926 (7.9%)   | 15.2% (6.8-22.9)   | 0.001  | 760 (8.7%)                                                        | 903 (7.9%)   | 15.8% (7.3-23.6)   | <0.001 |
| Respiratory diseases             | 509 (12.2%)                                             | 788 (6.3%)   | 35.4% (27.8-42.2) | <0.001 | 343 (3.6%)                                                         | 654 (5.2%)   | 47.6% (40.2-54.0)  | <0.001 | 277 (3.1%)                                                       | 465 (4.0%)   | 40.4% (30.9-48.7)  | <0.001 | 369 (4.2%)                                                        | 482 (4.2%)   | 23.4% (12.3-33.2)  | <0.001 |
| Gastrointestinal diseases        | 383 (9.2%)                                              | 1354 (10.9%) | 71.7% (68.3-74.7) | <0.001 | 963 (10.2%)                                                        | 1320 (10.5%) | 27.0% (20.7-32.9)  | <0.001 | 944 (10.7%)                                                      | 1301 (11.1%) | 27.4% (21.1-33.3)  | <0.001 | 1027 (11.8%)                                                      | 1346 (11.8%) | 23.7% (17.2-29.7)  | <0.001 |
| Urological diseases              | 219 (5.3%)                                              | 682 (5.5%)   | 67.9% (62.6-72.4) | <0.001 | 544 (5.8%)                                                         | 769 (6.1%)   | 29.3% (21.0-36.6)  | <0.001 | 579 (6.6%)                                                       | 749 (6.4%)   | 22.7% (13.8-30.6)  | <0.001 | 581 (6.7%)                                                        | 698 (6.1%)   | 16.8% (7.1-25.4)   | 0.001  |
| Ob/gyn diseases                  | 96 (2.3%)                                               | 210 (1.7%)   | 54.3% (41.8-64.1) | <0.001 | 136 (1.4%)                                                         | 222 (1.8%)   | 38.7% (24.2-50.5)  | <0.001 | 172 (2.0%)                                                       | 212 (1.8%)   | 18.9% (0.8-33.6)   | 0.042  | 156 (1.8%)                                                        | 208 (1.8%)   | 25.0% (7.7-39.1)   | 0.007  |
| Trauma and burns                 | 416 (10%)                                               | 2144 (17.3%) | 80.6% (78.4-82.5) | <0.001 | 1627 (17.3%)                                                       | 2294 (18.2%) | 29.1% (24.4-33.4)  | <0.001 | 1766 (20.1%)                                                     | 2118 (18.0%) | 16.6% (11.2-21.7)  | <0.001 | 1552 (17.9%)                                                      | 1752 (15.4%) | 11.4% (5.2-17.3)   | 0.001  |

|                       |            |            |                   |        |            |            |                    |       |            |            |                   |        |            |            |                   |        |
|-----------------------|------------|------------|-------------------|--------|------------|------------|--------------------|-------|------------|------------|-------------------|--------|------------|------------|-------------------|--------|
| Syncope               | 29 (0.7%)  | 118 (1.0%) | 75.4% (63.1-83.6) | <0.001 | 87 (0.9%)  | 102 (0.8%) | 14.7% (-13.5-35.9) | 0.276 | 85 (1.0%)  | 119 (1.0%) | 28.6% (5.6-45.9)  | 0.018  | 74 (0.9%)  | 98 (0.9%)  | 24.5% (-2.1-44.2) | 0.068  |
| Unspecific chest pain | 150 (3.6%) | 364 (2.9%) | 58.8% (50.2-65.9) | <0.001 | 252 (2.7%) | 294 (2.3%) | 14.3% (-1.4-27.6)  | 0.073 | 214 (2.4%) | 300 (2.5%) | 28.7% (15.0-40.1) | <0.001 | 205 (2.4%) | 309 (2.7%) | 33.7% (20.8-44.4) | <0.001 |

cum. No. = cumulative number; %ch. = percent change. Percent values in parentheses are relative to total ED visits in each period.

**Appendix Table 6.** ED outcome (admission/discharge) and admissions for non-COVID-19 diagnoses in the selected periods, with corresponding % change compared to 2019.

|                                            | 31 <sup>st</sup> Mar-13 <sup>th</sup> Apr (peak period) |               |                    |          | 16 <sup>th</sup> Jun-29 <sup>th</sup> Jun (early post-peak period) |               |                     |          | 14 <sup>th</sup> Jul-27 <sup>th</sup> Jul (mid post-peak period) |              |                     |          | 18 <sup>th</sup> Aug-31 <sup>st</sup> Aug (late post-peak period) |              |                    |          |
|--------------------------------------------|---------------------------------------------------------|---------------|--------------------|----------|--------------------------------------------------------------------|---------------|---------------------|----------|------------------------------------------------------------------|--------------|---------------------|----------|-------------------------------------------------------------------|--------------|--------------------|----------|
|                                            | 2020                                                    | 2019          |                    |          | 2020                                                               | 2019          |                     |          | 2020                                                             | 2019         |                     |          | 2020                                                              | 2019         |                    |          |
|                                            | cum. No.                                                | cum. No.      | %ch.               | <i>P</i> | cum. No.                                                           | cum. No.      | %ch.                | <i>P</i> | cum. No.                                                         | cum. No.     | %ch.                | <i>P</i> | cum. No.                                                          | cum. No.     | %ch.               | <i>P</i> |
| <b>ED disposal</b>                         |                                                         |               |                    |          |                                                                    |               |                     |          |                                                                  |              |                     |          |                                                                   |              |                    |          |
| Hospital admission                         | 823 (19.7%)                                             | 1360 (11.0%)  | 39.5% (28.6-67.7)  | <0.001   | 1174 (12.5%)                                                       | 1346 (10.7%)  | 12.8% (5.7-19.3)    | 0.001    | 1229 (14.0%)                                                     | 1311 (11.1%) | 6.3% (-1.3-13.3)    | 0.104    | 1175 (13.5%)                                                      | 1338 (11.8%) | 12.2% (5.0-18.8)   | 0.001    |
| Home discharge                             | 2811 (67.4%)                                            | 10084 (81.2%) | 72.1% (70.9-73.3%) | <0.001   | 6887 (73.2%)                                                       | 10258 (81.4%) | 32.9% (30.8-34.9)   | <0.001   | 7038 (80.0%)                                                     | 9597 (81.6%) | 26.7% (24.4-28.9)   | <0.001   | 6723 (77.3%)                                                      | 8897 (78.3%) | 24.4% (22.0-26.8)  | <0.001   |
| <b>Hospital admission by disease group</b> |                                                         |               |                    |          |                                                                    |               |                     |          |                                                                  |              |                     |          |                                                                   |              |                    |          |
| Infectious diseases                        | 36 (4.4%)                                               | 75 (5.5%)     | 52.0% (28.6-67.7)  | <0.001   | 86 (7.3%)                                                          | 112 (8.3%)    | 23.2% (-1.7-42.0)   | 0.065    | 94 (7.6%)                                                        | 106 (8.1%)   | 11.3% (-17.1-32.8)  | 0.396    | 95 (8.1%)                                                         | 100 (7.5%)   | 5.0% (-25.8-28.3)  | 0.720    |
| Oncological diseases                       | 15 (1.8%)                                               | 34 (2.5%)     | 55.9% (19.0-76.0)  | 0.008    | 38 (3.2%)                                                          | 31 (2.3%)     | -22.6% (-97.0-23.7) | 0.400    | 42 (3.4%)                                                        | 38 (2.9%)    | -10.5% (-71.4-28.7) | 0.655    | 31 (2.6%)                                                         | 31 (2.3%)    | 0.0% (-64.5-39.2)  | 1.0      |
| Metabolic and Endocrine diseases           | 18 (2.2%)                                               | 32 (2.4%)     | 43.7% (-0.2-68.4)  | 0.051    | 31 (2.6%)                                                          | 34 (2.5%)     | 8.8% (-48.3-44.0)   | 0.710    | 39 (3.2%)                                                        | 36 (2.7%)    | -8.3% (-71.4-28.7)  | 0.729    | 34 (2.9%)                                                         | 31 (2.4%)    | -6.3% (-72.2-34.4) | 0.806    |
| Hematologic diseases                       | 14 (1.7%)                                               | 25 (1.8%)     | 44.0% (-7.7-70.9)  | 0.082    | 24 (2.0%)                                                          | 25 (1.9%)     | 4.0% (-68.1-45.2)   | 0.886    | 19 (1.5%)                                                        | 25 (1.9%)    | 24.0% (-38.0-58.1)  | 0.397    | 18 (1.5%)                                                         | 23 (1.7%)    | 21.7% (-45.0-57.8) | 0.436    |
| Psychiatric diseases                       | 24 (2.9%)                                               | 72 (5.3%)     | 66.7% (47.1-79.0)  | <0.001   | 60 (5.1%)                                                          | 92 (6.8%)     | 34.8% (9.7-52.9)    | 0.010    | 59 (4.8%)                                                        | 81 (6.2%)    | 27.2% (-1.9-47.9)   | 0.064    | 60 (5.1%)                                                         | 90 (6.7%)    | 33.3% (7.6-51.9)   | 0.015    |
| Neurological diseases                      | 18 (2.2%)                                               | 36 (2.6%)     | 50.0% (12.0-71.6)  | 0.016    | 30 (2.6%)                                                          | 45 (3.3%)     | 33.3% (-5.8-58.0)   | 0.085    | 50 (4.1%)                                                        | 36 (2.7%)    | -38.9% (-113.2-9.5) | 0.133    | 35 (3.0%)                                                         | 38 (2.8%)    | 7.9% (-45.8-41.8)  | 0.726    |
| Cardiovascular diseases                    | 184 (22.4%)                                             | 326 (24.0%)   | 43.6% (32.4-52.9)  | <0.001   | 318 (27.1%)                                                        | 272 (20.2%)   | -16.9% (-37.5-0.6)  | 0.059    | 302 (24.6%)                                                      | 284 (21.7%)  | -6.3% (-25.0-9.6)   | 0.457    | 269 (22.9%)                                                       | 278 (20.8%)  | 3.2% (-14.4-18.2)  | 0.700    |
| Respiratory diseases                       | 200 (24.3%)                                             | 216 (15.9%)   | 7.4% (-12.2-23-6)  | 0.433    | 118 (10.1%)                                                        | 190 (14.1%)   | 37.9% (21.9-50.6)   | <0.001   | 115 (9.4%)                                                       | 140 (10.7%)  | 17.9% (-5.1-35.8)   | 0.118    | 114 (9.7%)                                                        | 131 (9.8%)   | 13.0% (-11.9-32.3) | 0.278    |
| Gastrointestinal diseases                  | 86 (10.4%)                                              | 165 (12.1%)   | 47.9% (32.4-59.8)  | <0.001   | 143 (12.2%)                                                        | 160 (11.9%)   | 10.6% (-12.0-28.7)  | 0.329    | 161 (13.1%)                                                      | 194 (14.8%)  | 17.0% (-2.3-32.7)   | 0.080    | 161 (13.7%)                                                       | 197 (14.7%)  | 18.3% (-0.6-33.6)  | 0.058    |



|                       |           |           |                     |        |           |           |                      |       |           |           |                      |       |             |             |                    |       |
|-----------------------|-----------|-----------|---------------------|--------|-----------|-----------|----------------------|-------|-----------|-----------|----------------------|-------|-------------|-------------|--------------------|-------|
| Urological diseases   | 37 (4.5%) | 78 (5.7%) | 52.6% (29.9-67.9)   | <0.001 | 67 (5.7%) | 86 (6.4%) | 22.1% (-7.2-43.4)    | 0.126 | 75 (6.1%) | 88 (6.7%) | 14.8% (-16.0-37.4)   | 0.309 | 92 (7.8%)   | 92 (6.9%)   | 0.0% (-33.5-25.1)  | 1.0   |
| Ob/gyn diseases       | 29 (3.5%) | 52 (3.8%) | 44.2% (12.2-64.6)   | 0.012  | 21 (1.8%) | 39 (2.9%) | 46.2% (8.5-68.3)     | 0.022 | 34 (2.8%) | 46 (3.5%) | 26.1% (-15.1-52.6)   | 0.181 | 33 (2.8%)   | 56 (4.2%)   | 41.1% (9.4-61.7)   | 0.016 |
| Trauma and Burns      | 48 (5.8%) | 61 (4.5%) | 21.3% (-14.9-46.1)  | 0.214  | 66 (5.6%) | 89 (6.6%) | 25.8% (-2.0-46.1)    | 0.066 | 78 (6.3%) | 72 (5.5%) | -8.3% (-49.2-21.4)   | 0.624 | 299 (25.4%) | 337 (25.2%) | 11.3% (-3.7-24.1)  | 0.132 |
| Pediatric admissions  | 3 (0.4%)  | 34 (2.5%) | 91.2% (71.3-97.3)   | <0.001 | 6 (0.5%)  | 24 (1.8%) | 75.0% (38.8-89.8)    | 0.002 | 10 (0.8%) | 18 (1.4%) | 44.4% (-20.3-74.4)   | 0.136 | 11 (0.9%)   | 33 (2.5%)   | 66.7% (34.0-83.2)  | 0.002 |
| Syncope               | 2 (0.2%)  | 12 (0.9%) | 83.3% (25.5-96.3)   | 0.019  | 13 (1.1%) | 2 (0.9%)  | -8.3% (-137.4-50.6)  | 0.842 | 14 (1.1%) | 18 (1.4%) | 22.2% (-56.4-61.3)   | 0.481 | 9 (0.8%)    | 16 (1.2%)   | 43.7% (-27.3-75.1) | 0.167 |
| Unspecific chest pain | 6 (0.6%)  | 8 (0.6%)  | 25.0% (-116.2-74.0) | 0.594  | 10 (0.9%) | 8 (0.6%)  | -25.0% (-216.7-50.7) | 0.638 | 17 (1.4%) | 8 (0.6%)  | -112.5% (-392.4-8.3) | 0.079 | 6 (0.5%)    | 11 (0.8%)   | 45.5% (-47.5-79.8) | 0.232 |

cum. No. = cumulative number; %ch. = percent change. % values of hospital admissions and home discharges are relative to total ED visits in each period. % values of hospital admissions by disease group are relative to total hospital admissions in each period.

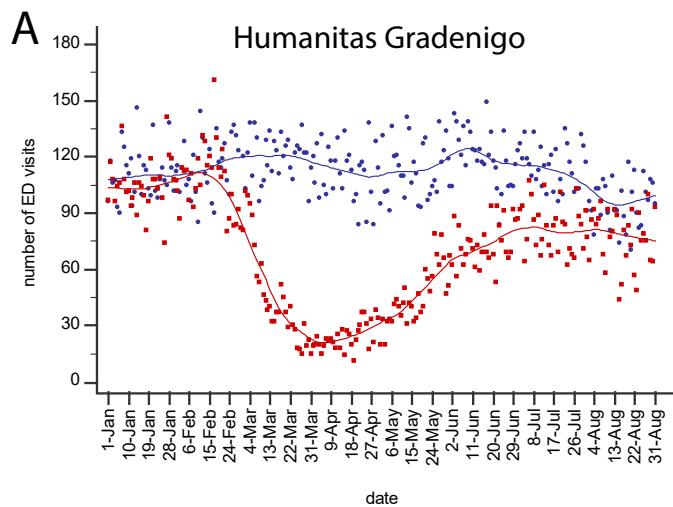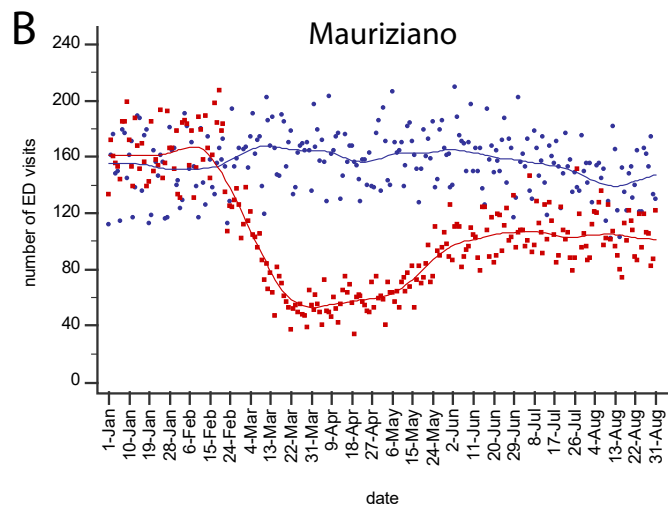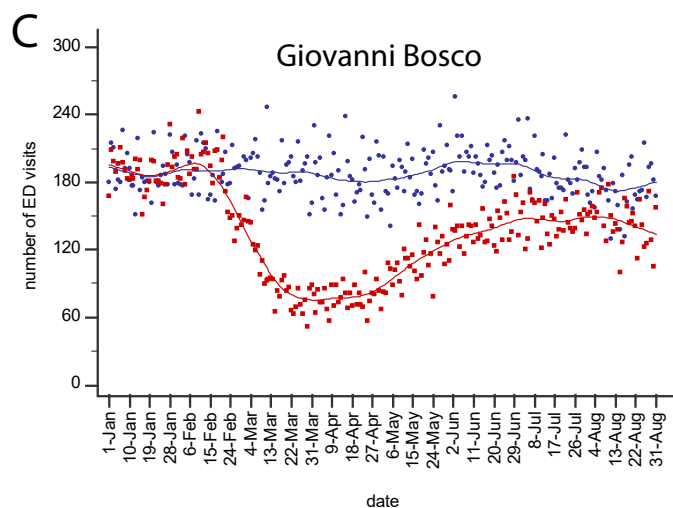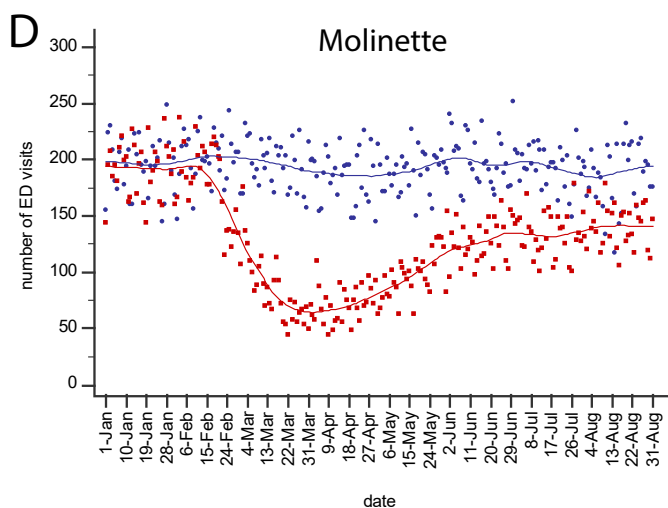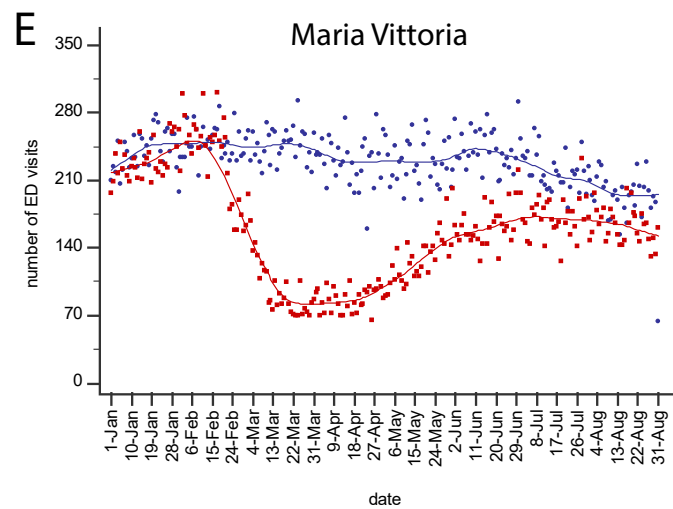

**Appendix figure 1.** Number of ED visits in each participant center (A to E). Red dots/line represent data in 2020, blue dots/line represent data in 2019.
